# Supplementary material for: Achieving highly efficient 2D SnC monolayer-based photocatalyst for water splitting via a synergistic strategy of S-scheme heterostructure construction and silicon doping
Source: Royal Society of Chemistry journal article supplement (doi:10.1039/d3nr05453e), 2024-01-01
Supplement: d3nr05453e1.pdf [file d3nr05453e1.pdf]

## Supplementary Information

### Achieving Highly Efficient 2D SnC monolayer-based Photocatalyst for Water Splitting via a Synergistic Strategy of S-scheme Heterostructure Construction and Silicon Doping

Dinghua Yang, Xi Zhang, Ya Nie, Hongyu Zhu and Gang Xiang\*

College of Physics, Sichuan University, Chengdu 610064, China

\*Corresponding authors' email: gxiang@scu.edu.cn

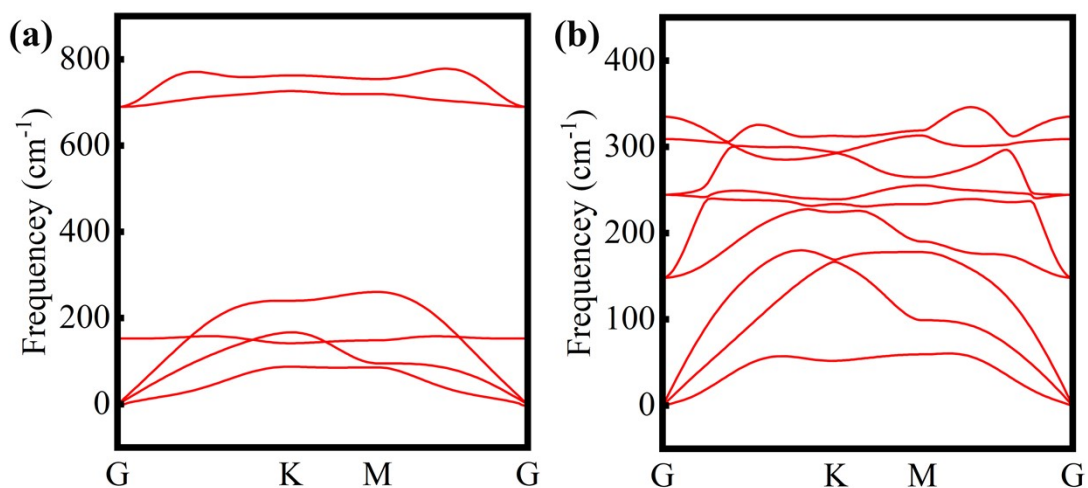

Fig. S1 The phonon spectra of (a) SnC ML and (b) ZrS<sub>2</sub> ML.

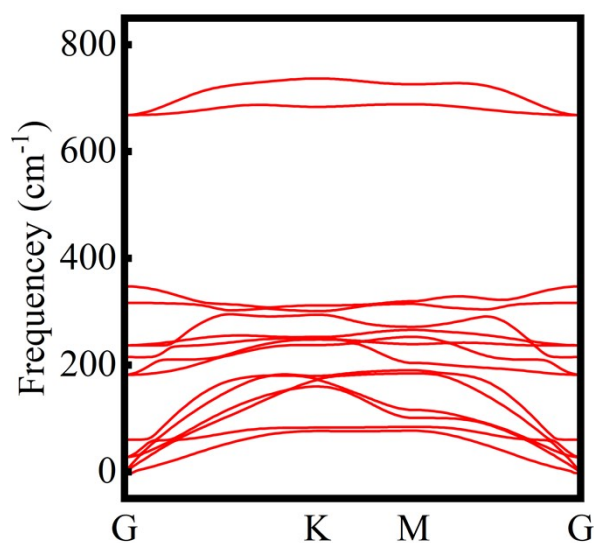

Fig. S2 The phonon spectrum of SnC/ZrS<sub>2</sub> HS.

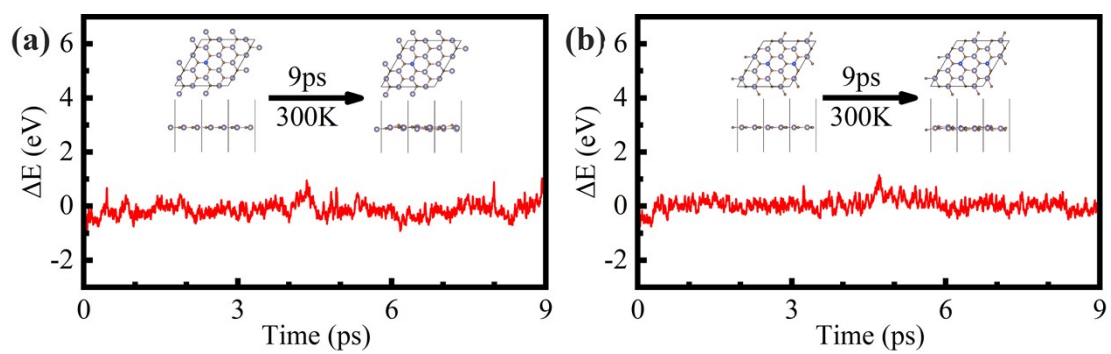

**Fig. S3** *ab initio* molecular dynamics simulations at 300 K of (a)  $\text{Sn}_{11}\text{Si}_1\text{C}_{12}$  and (b)  $\text{Sn}_{10}\text{Si}_2\text{C}_{12}$ .
